# Supplementary material for: Intrinsic short-tailed azole resistance in mucormycetes is due to an evolutionary conserved aminoacid substitution of the lanosterol 14α-demethylase
Source: PubMed Central journal article supplement (PMC5698289; doi:10.1038/s41598-017-16123-9), 2017-11-21
Supplement: 41598_2017_16123_MOESM1_ESM.pdf [file 41598_2017_16123_MOESM1_ESM.pdf]

1 **Supplementary Information**

2

3 **Intrinsic short-tailed azole resistance in mucormycetes is due to an**  
4 **evolutionary conserved aminoacid substitution of the lanosterol 14 $\alpha$ -**  
5 **demethylase.**

6

7 Rita Caramalho <sup>1</sup>, Joel D. A. Tyndall <sup>2</sup>, Brian C. Monk <sup>3</sup>, Thomas Larentis <sup>1</sup>, Cornelia  
8 Lass-Flörl <sup>1</sup> and Michaela Lackner <sup>1\*</sup>

9

10 <sup>1</sup> Division of Hygiene and Medical Microbiology, Medical University of Innsbruck,  
11 Schöpfstraße, number 41, 2<sup>nd</sup> floor, A-6020 Innsbruck, Austria;

12 <sup>2</sup> School of Pharmacy, University of Otago, Dunedin 9054, New Zealand;

13 <sup>3</sup> Sir John Walsh Research Institute and the Department of Oral Sciences, New  
14 Zealand's National Centre for Dentistry, University of Otago, Dunedin 9054, New  
15 Zealand.

16 \* corresponding author:

17 Ass. Prof. Priv.-Doz. Mag. Dr. rer. nat. Michaela Lackner Division of Hygiene and  
18 Medical Microbiology, Medical University of Innsbruck, Schöpfstraße 41, 6020  
19 Innsbruck, Austria, phone: +43 512 9003 70725, Email: Michaela.Lackner@i-  
20 med.ac.at

21

22

23 **Table S1.** *In vitro* antifungal susceptibility of *Mucor circinelloides*,  
 24 *Rhizopus microsporus*, and *Rhizopus arrhizus* against fluconazole and  
 25 triadimenol.

| Species<br>(n. strains tested) | Median MIC (range) <sup>a</sup><br>(mg/L) |                 |
|--------------------------------|-------------------------------------------|-----------------|
|                                | FLC                                       | TDM             |
| <i>R. arrhizus</i> (n=6)       | >64.00 (>64.00)                           | >16.00 (>16.00) |
| <i>R. microsporus</i> (n=6)    | >64.00 (>64.00)                           | >16.00 (>16.00) |
| <i>M. circinelloides</i> (n=6) | >64.00 (>64.00)                           | >16.00 (>16.00) |

**Table legend.** <sup>a</sup> FLC and TDM susceptibility according to CLSI standard microbroth dilution method; MIC. minimum inhibitory concentration; FLC, fluconazole; TDM, triadimenol.

27

28

29 **Table S2.** Accession numbers corresponding to fungal LDMs aligned with the CYP51 F5  
 30 and CYP51 F1 consensus sequences of Mucorales species *Rhizopus arrhizus*, *Rhizopus*  
 31 *microsporus*, and *Mucor circinelloides*.

| species                                         | LDM Genbank accession number                                |
|-------------------------------------------------|-------------------------------------------------------------|
| <i>Saccharomyces cerevisiae</i>                 | NP_011871                                                   |
| <i>Histoplasma capsulatum</i>                   | AAU01158.1                                                  |
| <i>Coccidioides posadasii</i>                   | KMM65971.1                                                  |
| <i>Coccidioides immitis</i>                     | XP_001246802.1                                              |
| <i>Pneumocystis carinii</i>                     | AAO38776.1                                                  |
| <i>Scedosporium apiospermum</i>                 | KEZ44212.1                                                  |
| <i>Zymoseptoria tritici</i>                     | AKA94187.1                                                  |
| <i>Uncinula necator</i>                         | O14442*                                                     |
| <i>Aspergillus fumigatus</i>                    | ACF18581.1                                                  |
| <i>Aspergillus flavus</i>                       | XP_002375123                                                |
| <i>Candida albicans</i>                         | ADO21804.1                                                  |
| <i>Candida glabrata</i>                         | XP_445876.1                                                 |
| <i>Candida tropicalis</i>                       | AMR44154.1                                                  |
| <i>Candida dubliniensis</i>                     | AAK57519.1                                                  |
| <i>Malassezia globosa</i>                       | XP_001730619.1                                              |
| <i>Cryptococcus neoformans var. grubii</i>      | AEX20237.1                                                  |
| <i>Cryptococcus gattii</i>                      | AEQ63274.1                                                  |
| <i>Mucor ambiguus</i> CYP51 F5/CYP51 F1         | A0A0C9M5D0*/A0A0C9M5R4*                                     |
| <i>Parasitella parasitica</i> CYP51 F5/CYP51 F1 | A0A0B7NND2*/ A0A0B7NSN9*                                    |
| <i>Absidia glauca</i> CYP51 F5/CYP51 F1         | ABSGL_12517.1 scaffold 12955*/ABSGL_12606.1 scaffold 13066* |

32 **Table legend.** LDM. lanosterol 14- $\alpha$  demethylase; \* accession number retrieved from UniProt  
 33 database (<http://www.uniprot.org/uniprot>).

**Table S3.** Conditions for the q-PCRs developed for CYP51 F5, CYP51 F1.

| qPCR gene target | species                  | direction | primer sequence (5' to 3') | amplicon size (bp) | targeted triplet | spanned CDS region   | translated aa | LDM location |
|------------------|--------------------------|-----------|----------------------------|--------------------|------------------|----------------------|---------------|--------------|
| CYP51 F5         | <i>R. arrhizus</i>       | For       | GGACCCGACGGKAACCAATT       | 208                | TTY              | positions 385 to 387 | phenylalanine | 129          |
|                  |                          | Rev       | ATTCCTCGATRATCAGCGGC       |                    |                  |                      |               |              |
|                  | <i>R. microsporus</i>    | For       | AAGCGCGTCACTGCATGCCT       | 196                |                  |                      |               |              |
|                  |                          | Rev       | ACGACTCGATATTTAAYCCGCT     |                    |                  |                      |               |              |
|                  | <i>M. circinelloides</i> | For       | CTCTTGGGTYCCCATCATGG       | 202                |                  |                      |               |              |
|                  |                          | Rev       | GTTGTAAGCAGCAGCAGCAG       |                    |                  |                      |               |              |
| CYP5 F1          | <i>R. arrhizus</i>       | For       | TGAATGCAGACGGAAACCAA       | 247                | TAY              | positions 379 to 381 | tyrosine      | 127          |
|                  |                          | Rev       | CCCGTAGGCTTCTTGTAGTTTT     |                    |                  |                      |               |              |
|                  | <i>R. microsporus</i>    | For       | ATATGGTTGGCCGACGTGTT       | 223                |                  |                      |               |              |
|                  |                          | Rev       | GGAACGTGTTGACGGAATGC       |                    |                  |                      |               |              |
|                  | <i>M. circinelloides</i> | For       | CCGTTCTCTTGGGTGCTGAT       | 203                |                  |                      |               |              |
|                  |                          | Rev       | GGGCACATGTTGACGRAARC       |                    |                  |                      |               |              |
| Actin            | all 3 species*           | For       | TCCTGGTATTGCGAYCGT         | 128                | N.A              | positions 388 to 390 |               | 130          |
|                  |                          | Rev       | GAGARGCYAARATGGAACCA       |                    |                  |                      |               |              |

**Table legend.** The primers, amplicon sizes, targeted triplets, the regions where these are located and the position of each respective translated amino acid used to confirm the expression of both CYP51 genes are presented. The qPCR primers and amplicon sizes used for the actin as normalization gene are also depicted. qPCR, quantitative reverse transcription PCR; for, forward; rev, reverse; bp, base pairs; CDS, coding sequence; aa, amino acid; LDM, lanosterol 14- $\alpha$  demethylase; N.A. not applicable; \**M. circinelloides*, *R. microsporus*, and *R. arrhizus*.

**Table S4.** Oligonucleotide primers used for amplification and sequencing of the pairs of paralogous CYP51 genes in three Mucorales species.

| primer name               | species                  | locus <sup>a</sup> | direction  | sequence (5' to 3')                    | AT (°C) | amplicon size (bp) |
|---------------------------|--------------------------|--------------------|------------|----------------------------------------|---------|--------------------|
| <b>Muci1_Fw</b>           | <i>M. circinelloides</i> | CYP51A F1          | <b>For</b> | <b>ACC TCA CTC CCC TCT CTC TCC A</b>   | 58      | 1800               |
| Muci1_R1                  |                          |                    | Rev        | CGG TGA CCT TCT TGC CGA CCA            |         |                    |
| Muci1_F2                  |                          |                    | For        | TCG AGT TGG CCG CTC GTC CT             |         |                    |
| <b>Muci1_c2</b>           |                          |                    | <b>Rv</b>  | <b>CAG GCA CAA CAA CCA TAG AAG TGT</b> |         |                    |
| <b>Muci2_Fw</b>           |                          | CYP51B F5          | <b>For</b> | <b>ACC GAT GGT GAC ACG CCG TA</b>      | 60      | 1967               |
| Muci2_F1.1                |                          |                    | For        | TGG GCC CTG ATG GCA ACC AA             |         |                    |
| Muci2_F2.1                |                          |                    | For        | TCT GCT CTC CCT GAC CAC CA             |         |                    |
| Muci2_R1                  |                          |                    | Rev        | TGT AGG AAT CGA CGA CAC CAG TCT        |         |                    |
| <b>Muci2_Rv</b>           |                          |                    | <b>Rev</b> | <b>GCG CAC ATG TAT TTG TCC AGT AGC</b> |         |                    |
| <b>Rmicr_CYP51A_FW</b>    | <i>R. microsporus</i>    | CYP51A F1          | <b>For</b> | CAG ACC CGT CCG TTA CAC AA             | 56      | 1779               |
| Rmicr_CYP51A_F2           |                          |                    | For        | AAC GCA AAG CAG AAT TTG GC             |         |                    |
| Rmicr_CYP51A_R1           |                          |                    | Rev        | AGA CAA CTT CAG GGC CAA ACA            |         |                    |
| Rmicr_CYP51A_F3           |                          |                    | For        | GGA ACA CCC TTA CCT GAT CAT CA         |         |                    |
| Rmicr_CYP51A_F4           |                          |                    | For        | GCG TGC CTA AGC CTG ACT AT             |         |                    |
| Rmicr_CYP51A_R2           |                          |                    | Rev        | CAG AGG TGT GTT GAC CAC CA             |         |                    |
| <b>Rmicr_CYP51A_RV</b>    |                          |                    | <b>Rev</b> | <b>TGC TCC GTC ACT ACA CAT GT</b>      |         |                    |
| <b>Rmic_Fw</b>            |                          | CYP51B F5          | <b>For</b> | <b>TGC CGG GCT CGA TGA CCG AT</b>      | 60      | 1568               |
| Rmic_F1                   |                          |                    | For        | AAGCGCGTCACTGCATGCCT                   |         |                    |
| Rmic_R1                   |                          |                    | Rev        | TCT GCA ACG ACA CGG CGC AT             |         |                    |
| Rmic_F2                   |                          |                    | For        | TGG TCC AGA GGT TCG TAA CGC            |         |                    |
| <b>Rmic_Rv</b>            |                          |                    | <b>Rev</b> | <b>CGG TGG CGT CCA GCA CCA AA</b>      |         |                    |
| <b>Rdel_Cyp51A_1775fw</b> | <i>R. arrhizus</i>       | CYP51A F5          | <b>For</b> | <b>GTT CGA TCT GCT ACA AAC GCC</b>     | 58      | 2032               |

|                           |                  |            |                                      |    |      |
|---------------------------|------------------|------------|--------------------------------------|----|------|
| Rdel2.F2                  |                  | For        | AAA CGC GTC ACG GCC TGC TT           |    |      |
| Rdel2.R1                  |                  | Rev        | CCA GGC GGC AGT GGT GGA AG           |    |      |
| Rdel2.F3                  |                  | For        | TAC GG CCT CCC GTA CCC TGC           |    |      |
| Rdel2.Rv                  |                  | Rev        | ACA GGG TTC CAT CCG TTC CAG T        |    |      |
| <b>Rdel_CYP51A_19851v</b> |                  | <b>Rev</b> | <b>TTG ATG CTG ATG GCG CTC TAT</b>   |    |      |
| <b>Rdel_F1</b>            | <i>CYP51B</i> F1 | <b>For</b> | <b>TGC AAA TGG AGC CGC GAC GA</b>    | 58 | 1932 |
| Rdel_R1                   |                  | Rev        | TCG GAT GAG TTG TGT TAT CGC TTC      |    |      |
| Rdel_F1.1                 |                  | For        | TGC TCC TCA CAG CGT ATT CAT GG       |    |      |
| Rdel_F2.1                 |                  | For        | CGT ACC TGA CCA TCA CAT TGC CG       |    |      |
| <b>Rdel_Rv</b>            |                  | <b>Rev</b> | <b>ACG TCA CAT AGT TAA ACA GCC A</b> |    |      |

**Table legend:** <sup>a</sup> locus names *CYP51A* (F1) and *CYP51B* (F5) were attributed according to Nelson's database, as a result of BLAST analysis against P450 protein families. For, forward; Rev, reverse; AT, annealing temperature °C; bp. base pairs; primers shown in bold were used for both DNA amplification and Sanger sequencing.

1 **Figure S1.**

A)

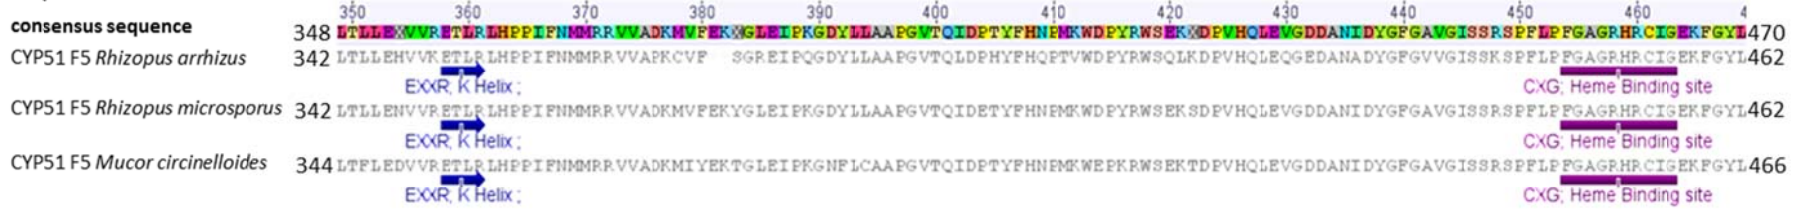

B)

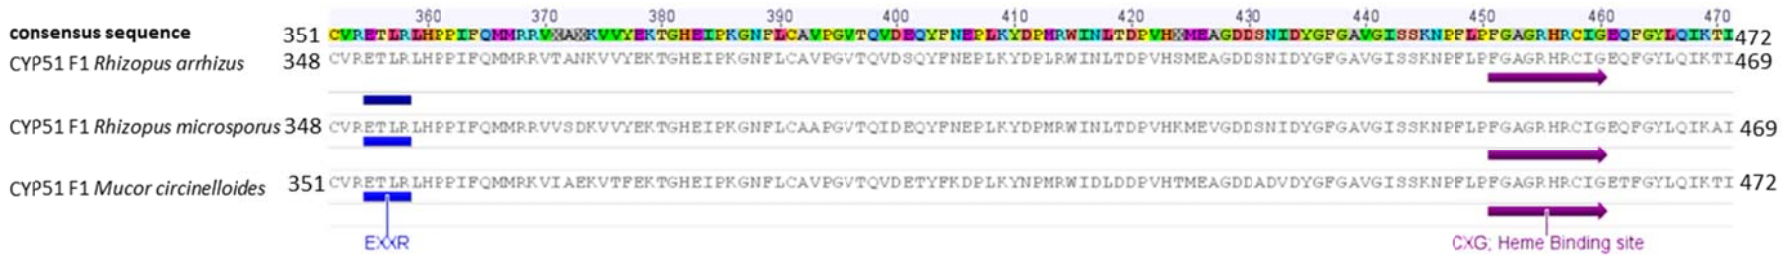

2

3 **Figure legend.** Sequence alignment of the two orthologous paralogous CYP51 genes showing consensus sequences retrieved  
 4 for the species *R. arrhizus*, *R. microspores* and *M. circinelloides* and the location of the conserved motifs EXXR (ETLR in both  
 5 protein sequences) marked in blue, and CXG (CIG in both protein sequences) marked in purple.

6

7 **Figure S2.**

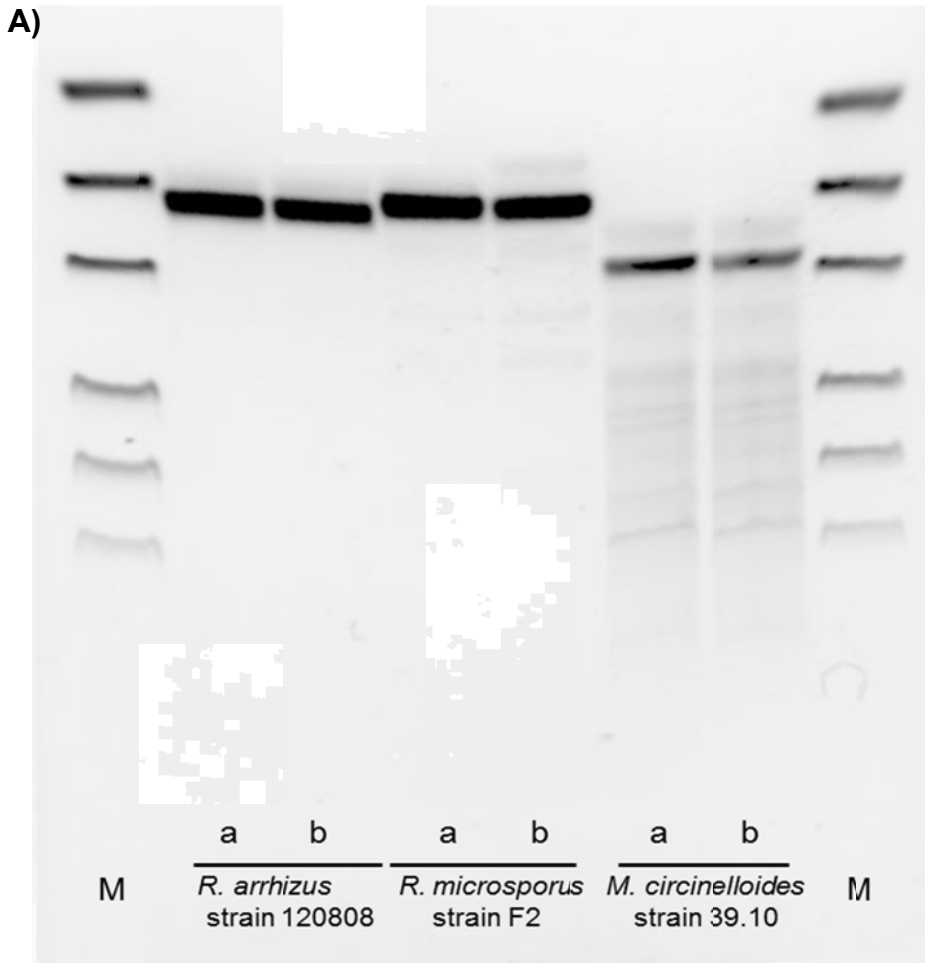

8

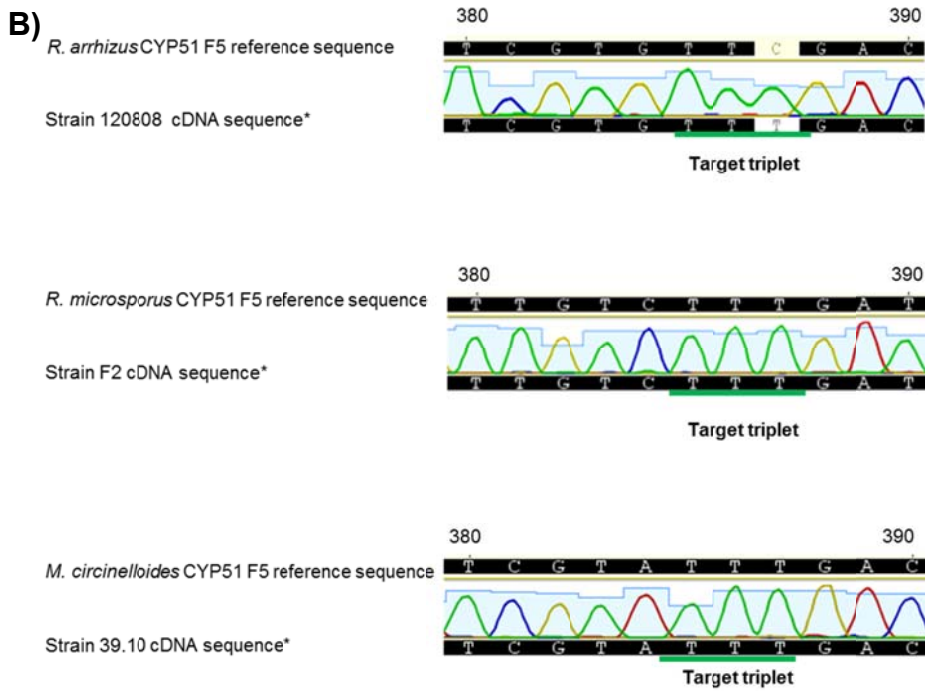

9



10 **Figure legend. A)** A 2% w/v agarose gel depicting cDNA products from three isolates  
11 of the species *R. arrhizus*, *R. microsporus*, and *M. circinelloides*, (CBS strain 120808,  
12 clinical isolate F2 and clinical isolate 39.10, respectively) obtained from the qPCR  
13 performed for expression of *CYP51 F5*; **a**, cDNA product obtained after 48 h growth  
14 without exposure to the ITC, and **b** cDNA product obtained after exposure for 48h to  
15 0.50 mg/L of ITC; M, 100 bp marker. **B)** Sequence analysis of each cDNA product  
16 shown in **A)** after ITC exposure. The sequence obtained using just the forward primer  
17 is shown (both primers were used for sequence analysis and assembly). The target  
18 triplet (positions 385 to 387) in the *CYP51 F5* CDS of the three species is underlined  
19 in green. For a better visualization the image was color-invented.

20 **Figure S3.** *Rhizopus arrhizus* and *R. microsporus* strains exhibit variable *in vitro* minimum inhibitory concentrations for voriconazole  
 21 according to CLSI microbroth dilution method.

| Phenotype                   | Species/strain number <sup>2</sup>                 | Lanosterol 14- $\alpha$ demethylase F5 partial sequence, mapped to reference |
|-----------------------------|----------------------------------------------------|------------------------------------------------------------------------------|
| VCZ MIC <sup>1</sup> (mg/L) |                                                    |                                                                              |
| n.a.                        | <i>Saccharomyces cerevisiae</i> ERG11 <sup>3</sup> | 130 T T P V F G K G V I <b>Y</b> D C P N S R L M E Q 150                     |
| 4.00                        | <i>R. arrhizus</i> / 120808 LDM F5                 | T K Y V F G N D I V <b>F</b> D T A H S I F M E Q                             |
| 16.00                       | <i>R. arrhizus</i> / 136236 LDM F5                 | T K Y V F G N D I V <b>F</b> D T A H S V F M E Q                             |
| >16.00                      | <i>R. arrhizus</i> / 136239 LDM F5                 | T K Y V F G N D I V <b>F</b> D T A H S V F M E Q                             |
| 4.00                        | <i>R. microsporus</i> / 71.11 LDM F5               | T K Y V F G N D V V <b>F</b> D T A H S I F M E Q                             |
| 8.00                        | <i>R. microsporus</i> / AS 40 LDM F5               | T K Y V F G N D V V <b>F</b> D T A H S I F M E Q                             |
| 16.00                       | <i>R. microsporus</i> / 30.10 LDM F5               | T K Y V F G N D V V <b>F</b> D T A H S I F M E Q                             |

22

23 **Figure legend.** Voriconazole (VCZ) minimum inhibitory concentrations (MIC<sup>1</sup>) were determined according to CLSI standard  
 24 microbroth dilution method <sup>[54]</sup> ; <sup>2</sup> strain information is given in a previous published study <sup>[32]</sup>; the partial LDM F5 sequence with amino  
 25 acid substitution Y140F (*S. cerevisiae* numbering) is mapped to the reference *S. cerevisiae* LDM <sup>3</sup> (accession number given in  
 26 Supplementary Table S2): LDM F5, lanosterol 14- $\alpha$  demethylase primary sequence translated from CYP51 F5 gene and named  
 27 according to Nelson's P450 Database <sup>27</sup>; location of the amino acid substitution in all Mucorales strains highlighted in bold; n.a. not  
 28 applicable.
